# Supplementary material for: What Matters in the Primary Care Relationship? Comparing General Practitioners' and Patients' Narratives
Source: Research Square preprint supplement (doi:10.21203/rs.3.rs-6986045/v1), 2025-07-15
Supplement: Supplementary file 1 [file 0cfbea0185eb1d7822e3b5c7.docx]

| Interview guide - Open-ended questions used in the interviews |
| --- |
| - How would you describe the ideal relationship between physician and patient? (*Elicits participants’ expectations and values regarding the physician‒patient relationship.*) |
| - How would you describe the quality of the relationship between you and the physician/patients? (*Encourages participants to reflect on their lived experience*.) |
| - On whom or what, from your point of view, does the difference that sometimes exists between an ideal physician‒patient relationship and the reality of the relationship depend? (*Explores perceived barriers and enablers affecting relational quality in healthcare settings*.) |
| Is there anything you would like to add? (*Allows participants to express concerns or insights that may not have emerged through the previous questions.*) |
